# Supplementary material for: Transdermal Nicotine Poisoning: A Rare Case Report of Occupational Exposure
Source: MDPI journal article supplement (doi:10.3390/toxics11050464), 2023-05-17
Supplement: s1 [file s1]

## Validation report

### 1. Validation Method

#### 1.1. Linearity

Six calibration curves were prepared with eight calibration standards (CS). Quantification was achieved by plotting the peak area ratios of uremic toxins (UT) to their internal standards (IS), and a weighting factor was determined. Back-calculated concentrations of the CS have to be within 85–115% of the nominal concentrations, except for the lower limit of quantification (LLOQ) a deviation of 20% was considered acceptable.

#### 1.2. Lower Limit of Quantification (LLOQ)

The LLOQ was the lowest concentration achievable with an accuracy between 80 and 120 % and a coefficient of variation of  $\pm 20$  % obtained over six measurements at three different days. Three levels were evaluated: 25, 100 and 500 ng/mL.

#### 1.3. Carry over

A blank sample was analyzed immediately after running three replicates of the highest CS to determine the carryover.

#### 1.4. Accuracy and precision

The accuracy (bias, %) and precision (coefficient of variation, CV %) of the assay were determined for the three QC levels (25, 100 and 500 ng/mL) over three different days. Each day, 6 replicates of each QC were processed. The intra-assay bias and CV takes into account the variability of the 6 replicates within each validation day and the inter-assay bias and CV evaluates the variability between the three validation days. An accuracy within the range 85-115% of the nominal values and a precision with a CV of  $\pm 15\%$  were required.

### 2. Validation results

#### 2.1. Linearity

Table S1. Mean concentration of calibrant, bias, standard deviation and coefficient of variation.

|                   |            | Theoretical concentrations (ng/mL) |      |      |       |      |      |       |
|-------------------|------------|------------------------------------|------|------|-------|------|------|-------|
| Molecules         |            | 1000                               | 500  | 250  | 100   | 50   | 25   | 10    |
| Nicotine          | Mean (n=6) | 1050                               | 482  | 246  | 99    | 46   | 24   | 11    |
|                   | Bias       | -4,9%                              | 3,7% | 1,8% | 1,3%  | 8,0% | 5,9% | -5,4% |
|                   | SD         | 32,6                               | 26,8 | 10,6 | 5,3   | 1,2  | 1,1  | 0,7   |
|                   | CV         | 3,1%                               | 5,6% | 4,3% | 5,4%  | 2,5% | 4,7% | 7,1%  |
| Cotinine          | Mean (n=6) | 1033                               | 483  | 232  | 101   | 48   | 24   | 10    |
|                   | Bias       | -3,3%                              | 3,4% | 7,0% | -1,3% | 3,4% | 4,8% | -2,8% |
|                   | SD         | 20,1                               | 19,5 | 1,8  | 5,2   | 2,0  | 1,4  | 0,5   |
|                   | CV         | 2,0%                               | 4,0% | 0,8% | 5,2%  | 4,0% | 5,7% | 4,4%  |
| 3-hydroxycotinine | Mean (n=6) | 1035                               | 486  | 230  | 99    | 47   | 24   | 11    |
|                   | Bias       | -3,5%                              | 2,8% | 7,9% | 0,9%  | 5,8% | 5,2% | -8,0% |
|                   | SD         | 23,9                               | 28,0 | 4,8  | 5,5   | 3,4  | 1,3  | 0,3   |
|                   | CV         | 2,3%                               | 5,8% | 2,1% | 5,5%  | 7,2% | 5,5% | 3,1%  |

### 2.2. Lower Limit of Quantification

Table S2. Lower limit of quantification (LLOQ).

| Intra-day (n=6)   |                 |        |          |
|-------------------|-----------------|--------|----------|
| Molecules         | LLOQ<br>(ng/mL) | CV (%) | Bias (%) |
| Nicotine          | 10              | 2.0%   | -7.8%    |
| Cotinine          | 10              | 2.2%   | -3.7%    |
| 3-hydroxycotinine | 10              | 3.6%   | 2.5%     |

### 2.3. Carry over

No chromatographic peaks were evident for the analytes and for the internal standards when a blank was injected just after the highest point in the calibration.

# 2.4. Accuracy and precision

Table S3. Intra-day and inter-day accuracy and precision.

| Molecules         | Theoretical concentration<br>(ng/mL) | Intra-day repeatability<br>(n = 6) |          | Inter-day repeatability<br>(n = 6) |          |
|-------------------|--------------------------------------|------------------------------------|----------|------------------------------------|----------|
|                   |                                      | CV (%)                             | Bias (%) | CV (%)                             | Bias (%) |
| Nicotine          | 25                                   | 14%                                | -7.7%    | 12%                                | -2.0%    |
|                   | 100                                  | 13%                                | -7.6%    | 9.9%                               | 1.8%     |
|                   | 500                                  | 10%                                | 1.1%     | 8.0%                               | 2.4%     |
| Cotinine          | 25                                   | 13%                                | 7.8%     | 6.8%                               | 0.6%     |
|                   | 100                                  | 4.0%                               | 9.7%     | 9.5%                               | 1.3%     |
|                   | 500                                  | 7.4%                               | 5.9%     | 5.5%                               | 2.4%     |
| 3-hydroxycotinine | 25                                   | 11%                                | -2.8%    | 5.6%                               | -7.2%    |
|                   | 100                                  | 3.6%                               | -12%     | 7.2%                               | -1.0%    |
|                   | 500                                  | 8.1%                               | -0.3%    | 13%                                | 0.9%     |
